# Supplementary material for: Polymerized Selenium Nanoparticles for Folate-Receptor-Targeted Delivery of Anti-Luc-siRNA: Potential for Gene Silencing
Source: MDPI journal article supplement (doi:10.3390/biomedicines8040076), 2020-04-05
Supplement: s1 [file s1]

## Supplementary Material

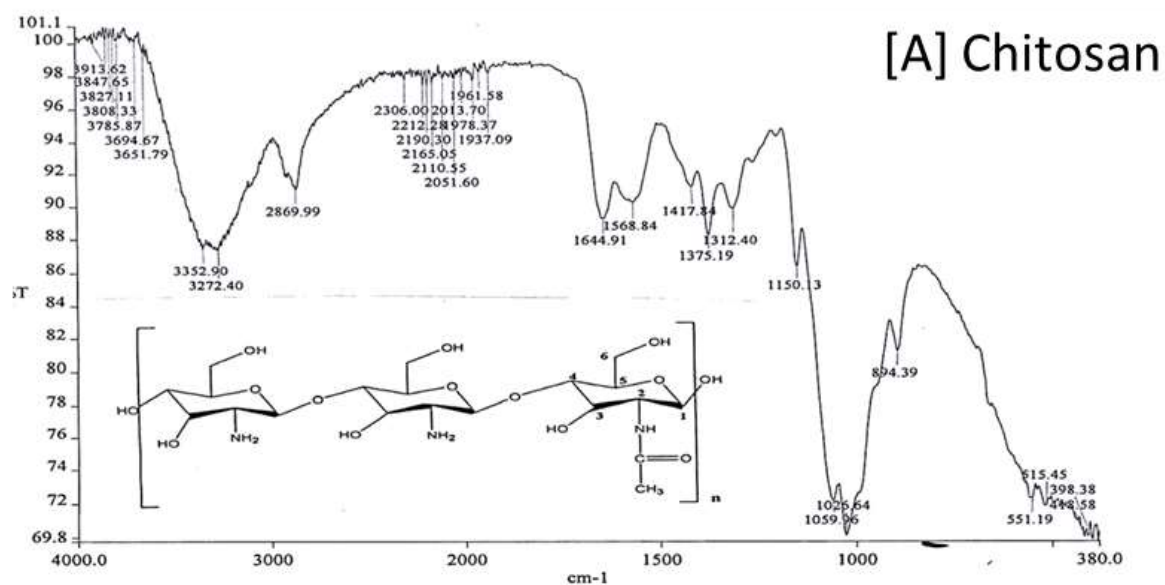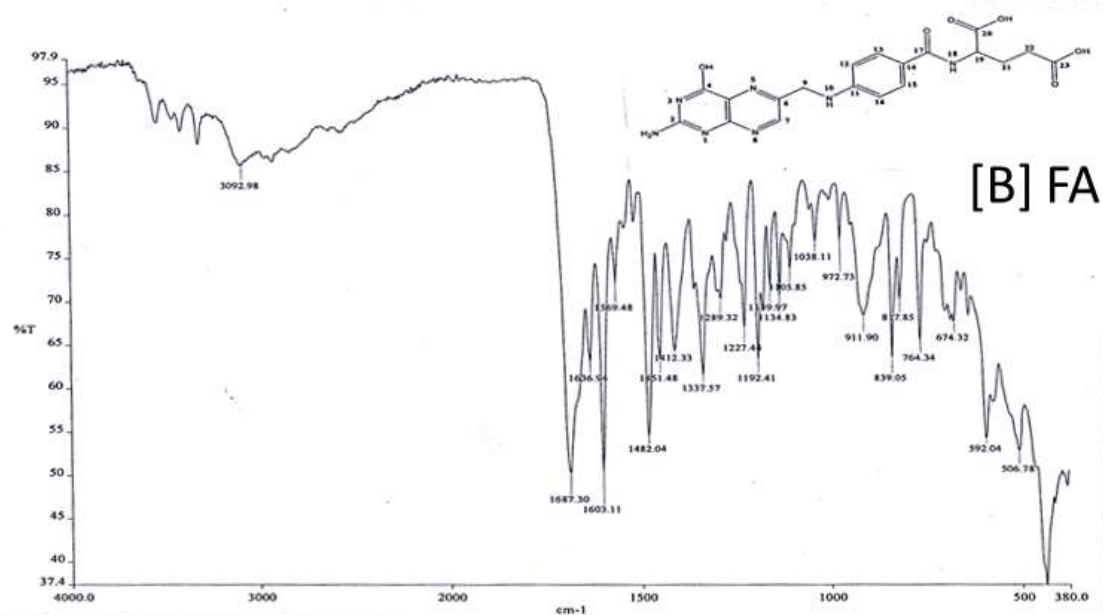

Figure S1: FTIR of (A) Chitosan (Ch), and (B) Folic acid (FA).

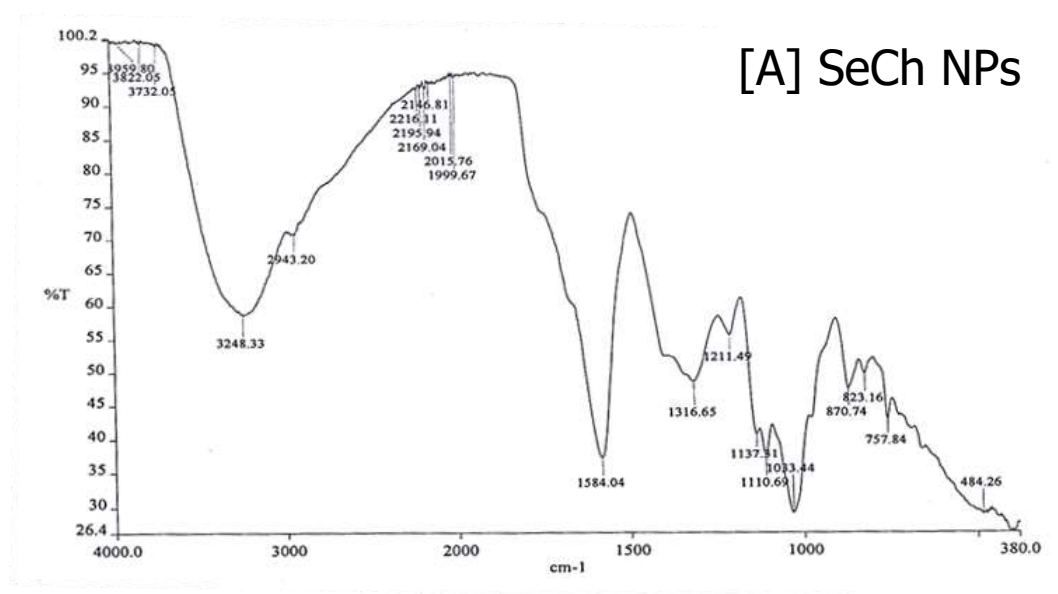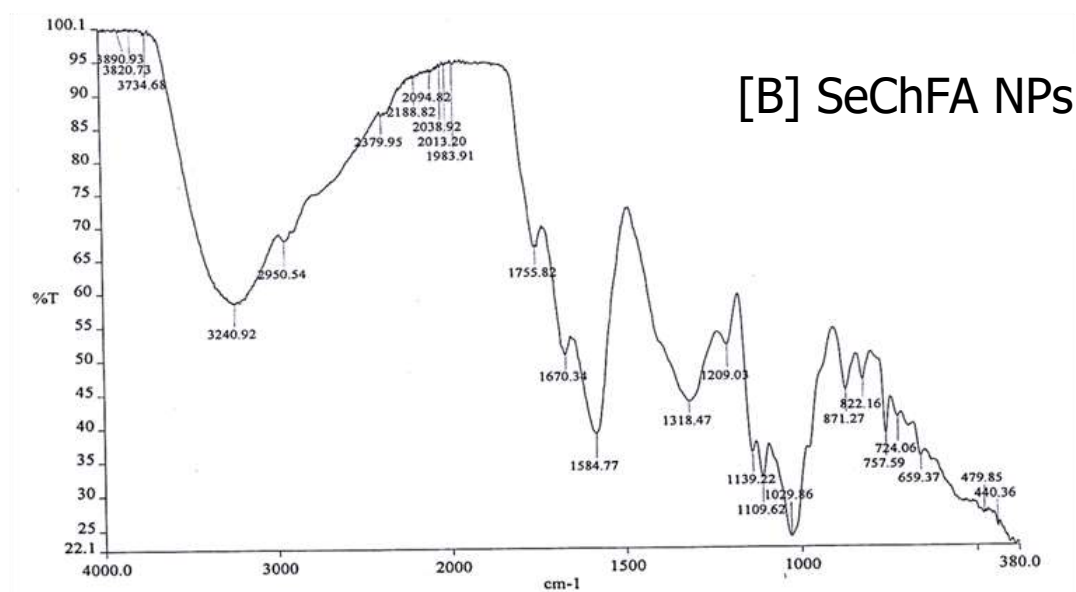

Figure S2: FTIR of (A) SeCh NPs and (B) SeChFA NPs.
